# Supplementary material
Source: Elsevier journal article supplement (https://www.sciencedirect.com/science/article/pii/S021348531930129X)
Supplement: mmc1 [file S021348531930129X:mmc1.pdf]

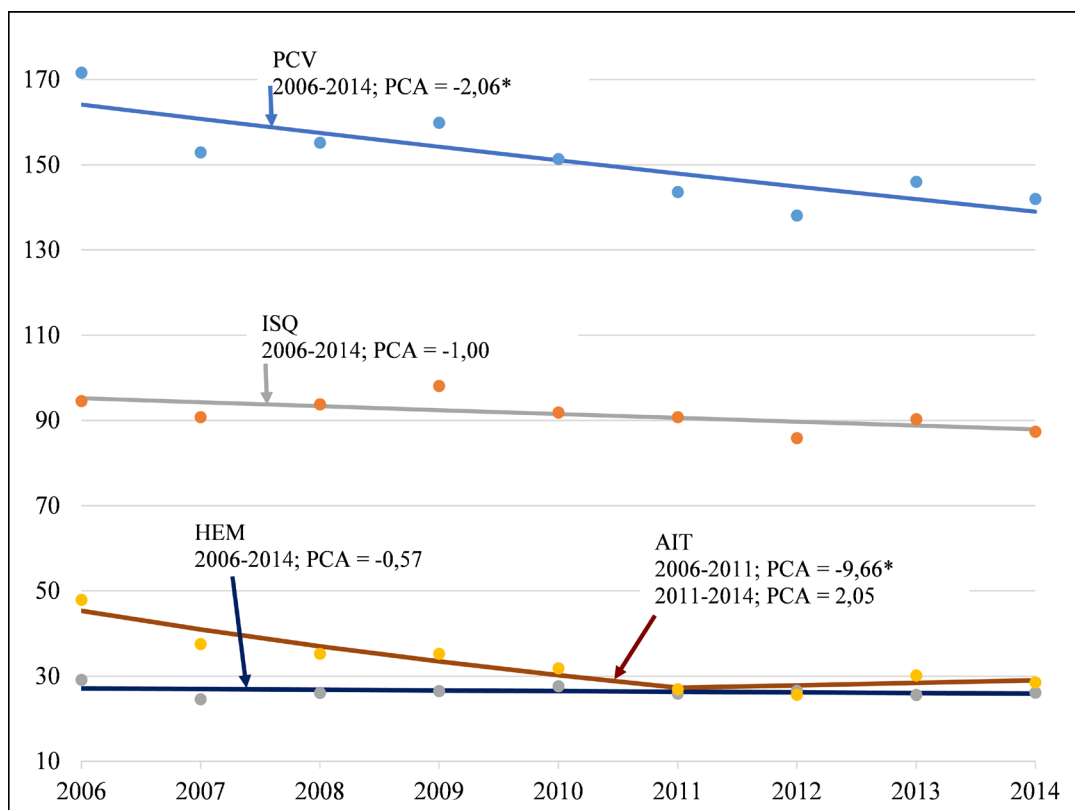

Figura A.1. Tendencia de los episodios por Patología Cerebrovascular (Análisis de regresión de Joinpoint). Tasa estandarizada (población europea estándar) por 100.000 habitantes, periodo 2006-2014, Región de Murcia. PCV: patología cerebrovascular. ISQ: ictus isquémico. HEM: ictus hemorrágico. AIT: accidente isquémico transitorio. PCA: porcentaje de cambio anual medio (%). Puntos: valores observados (tasas estandarizadas). Línea: tendencia (tasas calculadas). Números negativos: PCA descendente. Números positivos: PCA ascendente. \*PCA con diferencia estadísticamente significativa ( $p < 0,05$ ). Resultados estadísticamente significativos: Cada año las tasas de PCV (todo el periodo) y AIT ("joinpoint" año 2011) del periodo 2006-2011 disminuyeron de media 2,06% y 9,66% respectivamente.
